# Supplementary material for: Enhanced inhibitory activity of compounds containing purine scaffolds compared to protein kinase CK2α considering crystalline water
Source: Royal Society of Chemistry journal article supplement (doi:10.1039/d3md00755c), 2024-01-01

### *Supplementary information*

## **Enhanced inhibitory activity of compounds containing purine scaffolds compared to protein kinase CK2 $\alpha$ considering crystalline water**

Keiji Nishiwaki,<sup>\*a</sup> Shiori Nakatani,<sup>a</sup> Shinya Nakamura,<sup>a</sup> Kenji Yoshioka,<sup>a</sup> Eri Nakagawa,<sup>a</sup> Masato Tsuyuguchi,<sup>b‡</sup> Takayoshi Kinoshita,<sup>b</sup> Isao Nakanishi <sup>\*ac</sup>

<sup>a</sup> *Department of Pharmaceutical Sciences, Faculty of Pharmacy, Kindai University, 3-4-1 Kowakae, Higashiosaka, Osaka 577-8502, Japan*

<sup>b</sup> *Graduate School of Science, Osaka Metropolitan University, 1-1 Gakuen-cho, Naka-ku, Sakai, Osaka 599-8531, Japan*

<sup>c</sup> *Antiaging Center, Kindai University, 3-4-1 Kowakae, Higashiosaka, Osaka 577-8502, Japan.*

*‡ Present address: High Energy Accelerator Research Organization (KEK), Institute of Materials Structure Science, Structural Biology Research Center, 1-1 Oho, Tsukuba, Ibaraki 305-0801, Japan*

### **Table of contents**

#### **1. Molecular dynamics simulations**

**1.1 Complex structures of compounds and CK2 $\alpha$  after MD simulation** S2

**1.2 Detailed data of calculation results** S4

**2. Spectral data** S9

Trajectory files (zip) of the MD simulation of compounds 2–7 can be downloaded from  
<https://doi.org/10.7910/DVN/MMVYEC>

## 1. Molecular dynamics simulations

### 1.1 Complex structures of compounds and CK2 $\alpha$ after MD simulation

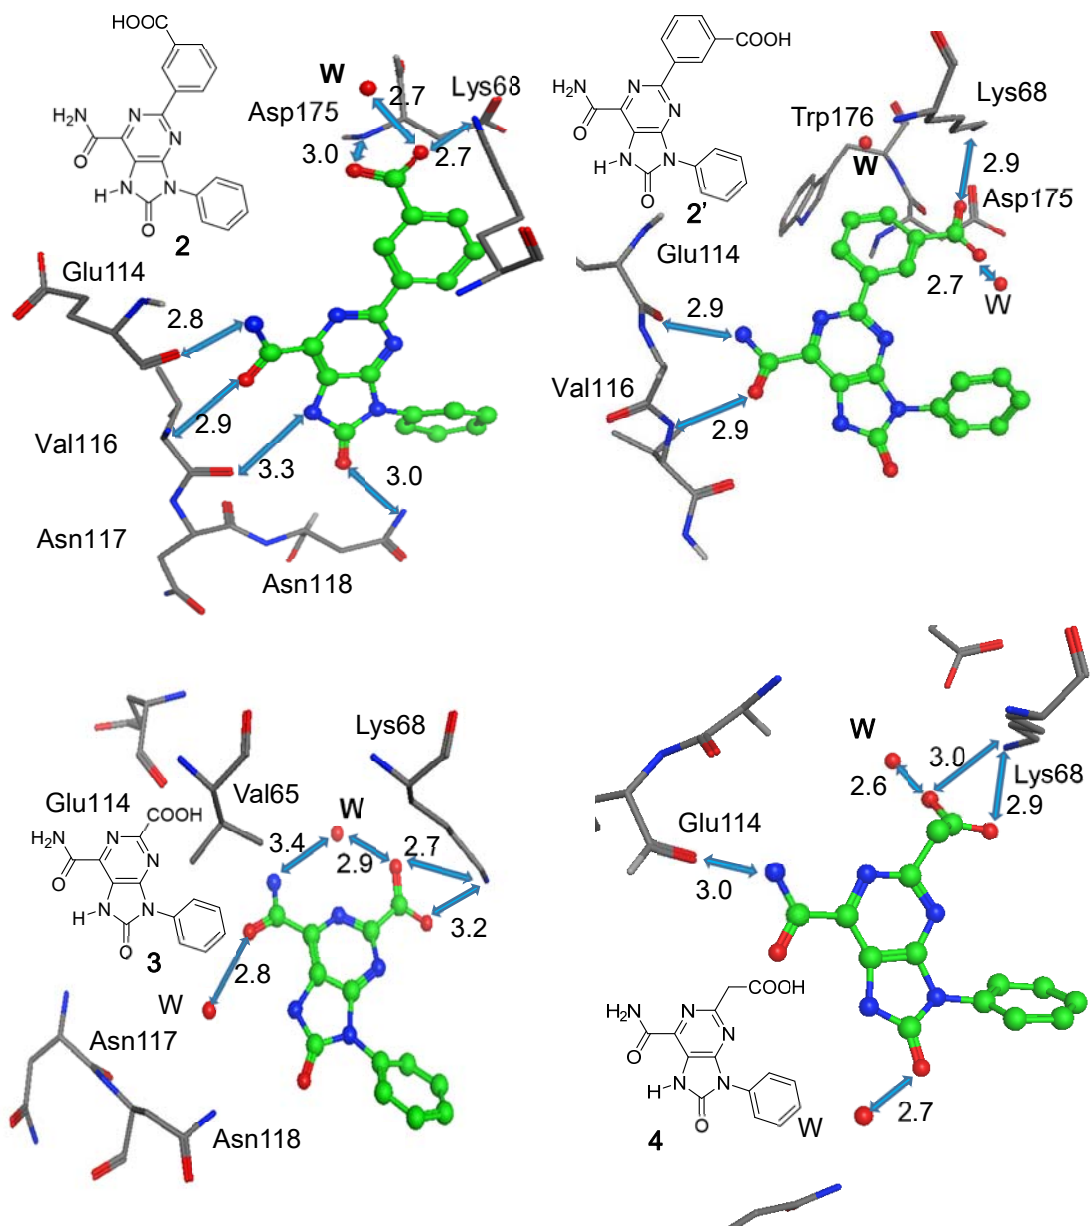

continued on next page

**Figure S1-1.** Complex structures of design compounds and CK2 $\alpha$  after MD simulation

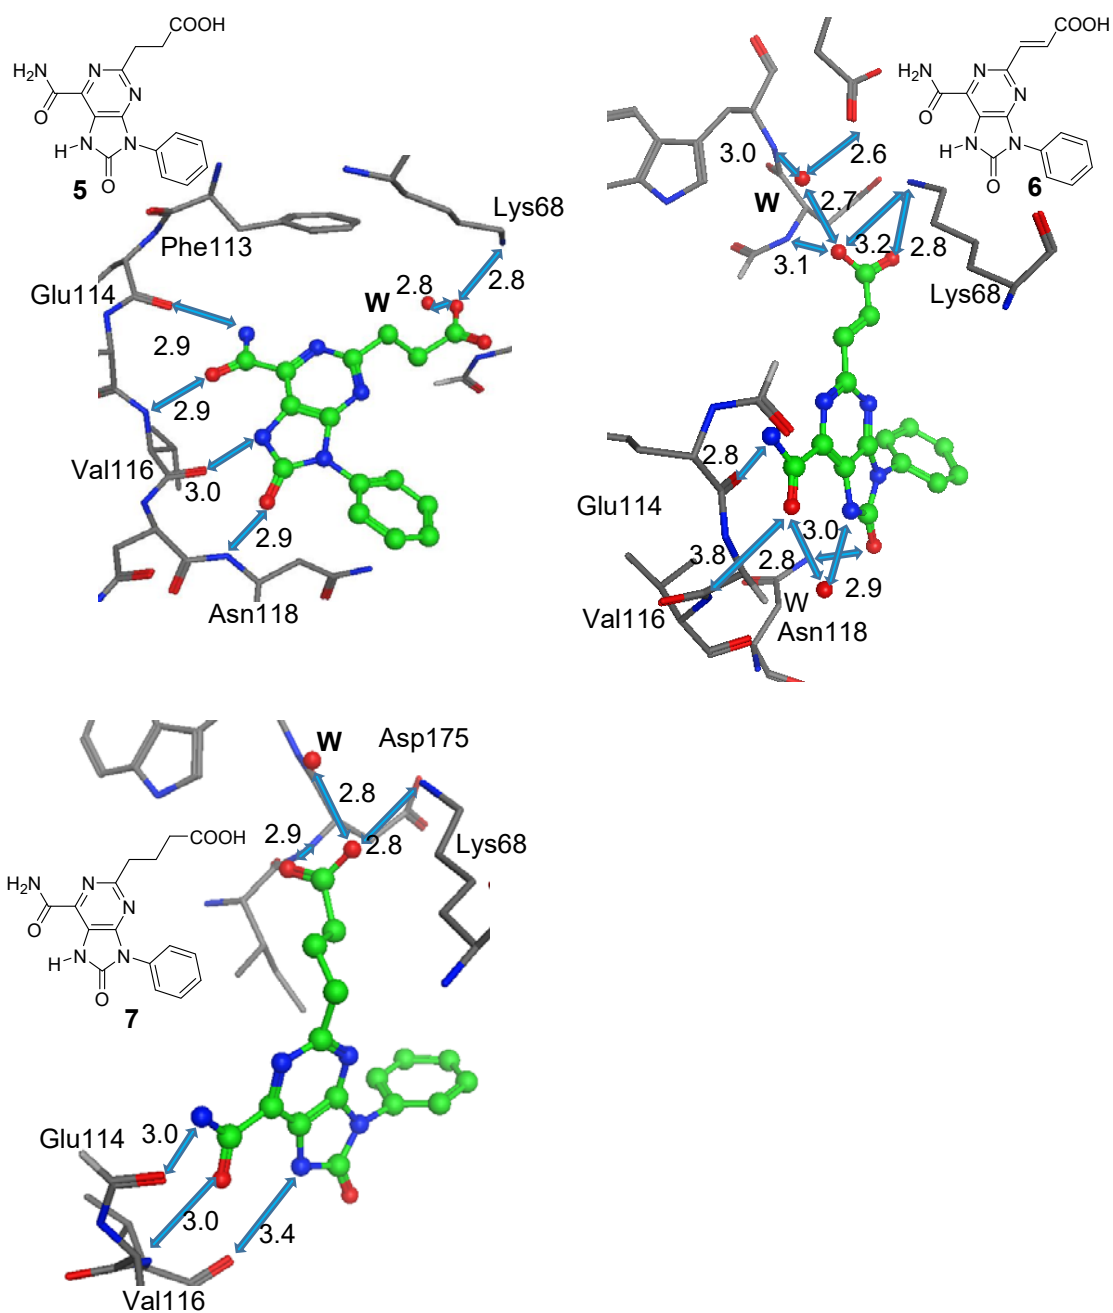

**Figure S1-2.** Complex structures of design compounds and CK2 $\alpha$  after MD simulation

## 1.2 Detailed data of calculation results

**Table S1-1. RMSD,  $\Delta G_{\text{PBSA}}$  and  $\Delta G_{\text{bind}}$  of compound 1**

| Run       | RMSD (Å) | $\Delta G_{\text{PBSA}}$ (kcal/mol) | $\Delta G_{\text{bind}}$ (kcal/mol) |
|-----------|----------|-------------------------------------|-------------------------------------|
| 1         | 2.12     | -27.8                               | -2.67                               |
| 2         | 3.10     | -40.9                               | -6.73                               |
| 3         | 2.92     | -40.7                               | 0.0                                 |
| 4         | 2.31     | -35.8                               | -7.50                               |
| 5         | 2.32     | -35.3                               | -7.9                                |
| Average   | 2.55     | -36.1                               | -5.0                                |
| $\pm$ MAE | 0.36     | 3.8                                 | 2.9                                 |

(MAE : Mean Absolute Error)

**Table S1-2. Component analysis of  $\Delta G_{\text{PBSA}}$  of compound 1**

| Run     | $E_{\text{vdw}}$ | $E_{\text{ele}}$ | $E_{\text{PB}}$ | $E_{\text{SA}}$ | $E_{\text{interaction}}$ | $E_{\text{desolvation}}$ | $E_{\text{NonPolar}}$ | $E_{\text{Polar}}$ | $\Delta G_{\text{PBSA}}$ |
|---------|------------------|------------------|-----------------|-----------------|--------------------------|--------------------------|-----------------------|--------------------|--------------------------|
| 1       | -42.4            | -163.9           | 181.9           | -3.4            | -206.3                   | 178.5                    | -45.8                 | 18.1               | -27.8                    |
| 2       | -40.1            | -146.3           | 148.9           | -3.4            | -186.5                   | 145.5                    | -43.5                 | 2.6                | -40.9                    |
| 3       | -40.6            | -171.0           | 174.3           | -3.4            | -211.7                   | 171.0                    | -44.0                 | 3.3                | -40.7                    |
| 4       | -40.1            | -151.4           | 158.9           | -3.3            | -191.4                   | 155.6                    | -43.4                 | 7.6                | -35.8                    |
| 5       | -40.7            | -133.7           | 142.5           | -3.4            | -174.4                   | 139.1                    | -44.0                 | 8.8                | -35.3                    |
| Average | -40.8            | -153.3           | 161.3           | -3.4            | -194.0                   | 157.9                    | -44.2                 | 8.1                | -36.1                    |

**Table S2-1. RMSD,  $\Delta G_{\text{PBSA}}$  and  $\Delta G_{\text{bind}}$  of compound 2**

| Run       | RMSD (Å) | $\Delta G_{\text{PBSA}}$ (kcal/mol) | $\Delta G_{\text{bind}}$ (kcal/mol) |
|-----------|----------|-------------------------------------|-------------------------------------|
| 1         | 3.39     | -35.5                               | -14.0                               |
| 2         | 3.71     | -36.7                               | -13.6                               |
| 3         | 3.30     | -37.1                               | -3.2                                |
| 4         | 3.68     | -36.4                               | -2.3                                |
| 5         | 3.21     | -36.4                               | -1.2                                |
| Average   | 3.46     | -36.4                               | -6.9                                |
| $\pm$ MAE | 0.19     | 0.4                                 | 5.6                                 |

**Table S2-2. Component analysis of  $\Delta G_{\text{PBSA}}$  of compound 2**

| Run | $E_{\text{vdw}}$ | $E_{\text{ele}}$ | $E_{\text{PB}}$ | $E_{\text{SA}}$ | $E_{\text{interaction}}$ | $E_{\text{desolvation}}$ | $E_{\text{NonPolar}}$ | $E_{\text{Polar}}$ | $\Delta G_{\text{PBSA}}$ |
|-----|------------------|------------------|-----------------|-----------------|--------------------------|--------------------------|-----------------------|--------------------|--------------------------|
| 1   | -38.6            | -143.1           | 149.4           | -3.2            | -181.7                   | 146.2                    | -41.8                 | 6.3                | -35.5                    |

|         |       |        |       |      |        |       |       |     |       |
|---------|-------|--------|-------|------|--------|-------|-------|-----|-------|
| 2       | -39.3 | -156.1 | 162.0 | -3.3 | -195.4 | 158.8 | -42.6 | 5.9 | -36.7 |
| 3       | -39.7 | -162.1 | 168.0 | -3.3 | -201.9 | 164.7 | -43.0 | 5.9 | -37.1 |
| 4       | -40.2 | -152.5 | 159.5 | -3.3 | -192.6 | 156.2 | -43.4 | 7.0 | -36.4 |
| 5       | -38.8 | -142.8 | 148.4 | -3.2 | -181.6 | 145.3 | -42.0 | 5.6 | -36.4 |
| Average | -39.3 | -151.3 | 157.5 | -3.2 | -190.7 | 154.2 | -42.6 | 6.1 | -36.4 |

**Table S3-1. RMSD,  $\Delta G_{\text{PBSA}}$  and  $\Delta G_{\text{bind}}$  of compound 2'**

| Run       | RMSD (Å) | $\Delta G_{\text{PBSA}}$ (kcal/mol) | $\Delta G_{\text{bind}}$ (kcal/mol) |
|-----------|----------|-------------------------------------|-------------------------------------|
| 1         | 3.05     | -39.6                               | 16.2                                |
| 2         | 2.51     | -40.2                               | 6.3                                 |
| 3         | 1.26     | -34.6                               | 1.5                                 |
| 4         | 1.48     | -34.5                               | -4.5                                |
| 5         | 2.22     | -37.7                               | 10.6                                |
| Average   | 2.10     | -37.3                               | 6.0                                 |
| $\pm$ MAE | 0.59     | 2.2                                 | 6.0                                 |

**Table S3-2. Component analysis of  $\Delta G_{\text{PBSA}}$  of compound 2'**

| Run     | $E_{\text{vdw}}$ | $E_{\text{ele}}$ | $E_{\text{PB}}$ | $E_{\text{SA}}$ | $E_{\text{interaction}}$ | $E_{\text{desolvation}}$ | $E_{\text{NonPolar}}$ | $E_{\text{Polar}}$ | $\Delta G_{\text{PBSA}}$ |
|---------|------------------|------------------|-----------------|-----------------|--------------------------|--------------------------|-----------------------|--------------------|--------------------------|
| 1       | -44.6            | -128.8           | 137.1           | -3.4            | -173.4                   | 133.8                    | -48.0                 | 8.4                | -39.6                    |
| 2       | -45.1            | -165.0           | 173.5           | -3.6            | -210.1                   | 169.9                    | -48.7                 | 8.5                | -40.2                    |
| 3       | -43.0            | -133.1           | 144.9           | -3.3            | -176.1                   | 141.6                    | -46.4                 | 11.8               | -34.6                    |
| 4       | -43.9            | -133.4           | 146.2           | -3.3            | -177.3                   | 142.9                    | -47.3                 | 12.8               | -34.5                    |
| 5       | -44.1            | -144.1           | 153.9           | -3.4            | -188.2                   | 150.5                    | -47.4                 | 9.8                | -37.7                    |
| Average | -44.2            | -140.9           | 151.1           | -3.4            | -185.0                   | 147.7                    | -47.5                 | 10.2               | -37.3                    |

**Table S4-1. RMSD,  $\Delta G_{\text{PBSA}}$  and  $\Delta G_{\text{bind}}$  of compound 3**

| Run       | RMSD (Å) | $\Delta G_{\text{PBSA}}$ (kcal/mol) | $\Delta G_{\text{bind}}$ (kcal/mol) |
|-----------|----------|-------------------------------------|-------------------------------------|
| 1         | 3.08     | -16.0                               | 21.7                                |
| 2         | 2.47     | -18.4                               | 14.0                                |
| 3         | 2.79     | -23.3                               | 15.3                                |
| 4         | 4.65     | -18.2                               | 18.4                                |
| 5         | 2.12     | -23.4                               | 9.3                                 |
| Average   | 3.02     | -19.9                               | 15.7                                |
| $\pm$ MAE | 0.67     | 2.8                                 | 3.4                                 |

**Table S4-2. Component analysis of  $\Delta G_{\text{PBSA}}$  of compound 3**

| Run     | $E_{\text{vdw}}$ | $E_{\text{ele}}$ | $E_{\text{PB}}$ | $E_{\text{SA}}$ | $E_{\text{interaction}}$ | $E_{\text{desolvation}}$ | $E_{\text{NonPolar}}$ | $E_{\text{Polar}}$ | $\Delta G_{\text{PBSA}}$ |
|---------|------------------|------------------|-----------------|-----------------|--------------------------|--------------------------|-----------------------|--------------------|--------------------------|
| 1       | -33.0            | -119.3           | 138.8           | -2.6            | -152.3                   | 136.2                    | -35.6                 | 19.5               | -16.0                    |
| 2       | -32.7            | -143.4           | 160.4           | -2.6            | -176.1                   | 157.7                    | -35.3                 | 17.0               | -18.4                    |
| 3       | -32.6            | -148.0           | 159.8           | -2.5            | -180.6                   | 157.3                    | -35.1                 | 11.8               | -23.3                    |
| 4       | -34.0            | -170.0           | 188.5           | -2.7            | -203.9                   | 185.8                    | -36.7                 | 18.5               | -18.2                    |
| 5       | -33.9            | -138.7           | 151.9           | -2.7            | -172.6                   | 149.2                    | -36.6                 | 13.2               | -23.4                    |
| Average | -33.2            | -143.9           | 159.9           | -2.6            | -177.1                   | 157.3                    | -35.8                 | 16.0               | -19.9                    |

**Table S5-1. RMSD,  $\Delta G_{\text{PBSA}}$  and  $\Delta G_{\text{bind}}$  of compound 4**

| Run       | RMSD (Å) | $\Delta G_{\text{PBSA}}$ (kcal/mol) | $\Delta G_{\text{bind}}$ (kcal/mol) |
|-----------|----------|-------------------------------------|-------------------------------------|
| 1         | 2.02     | -31.8                               | -6.33                               |
| 2         | 1.98     | -29.6                               | 5.1                                 |
| 3         | 2.86     | -21.3                               | 10.6                                |
| 4         | 2.05     | -32.6                               | 4.7                                 |
| 5         | 2.00     | -29.3                               | 3.1                                 |
| Average   | 2.18     | -28.9                               | 3.5                                 |
| $\pm$ MAE | 0.27     | 3.0                                 | 4.1                                 |

**Table S5-2. Component analysis of  $\Delta G_{\text{PBSA}}$  of compound 4**

| Run     | $E_{\text{vdw}}$ | $E_{\text{ele}}$ | $E_{\text{PB}}$ | $E_{\text{SA}}$ | $E_{\text{interaction}}$ | $E_{\text{desolvation}}$ | $E_{\text{NonPolar}}$ | $E_{\text{Polar}}$ | $\Delta G_{\text{PBSA}}$ |
|---------|------------------|------------------|-----------------|-----------------|--------------------------|--------------------------|-----------------------|--------------------|--------------------------|
| 1       | -37.3            | -134.4           | 142.8           | -2.9            | -171.7                   | 140.0                    | -40.2                 | 8.4                | -31.8                    |
| 2       | -35.6            | -136.8           | 145.7           | -2.9            | -172.4                   | 142.8                    | -38.5                 | 8.9                | -29.6                    |
| 3       | -34.1            | -139.0           | 154.5           | -2.8            | -173.0                   | 151.7                    | -36.9                 | 15.5               | -21.3                    |
| 4       | -35.1            | -151.0           | 156.3           | -2.8            | -186.1                   | 153.5                    | -37.8                 | 5.2                | -32.6                    |
| 5       | -36.3            | -146.9           | 156.8           | -2.9            | -183.2                   | 153.9                    | -39.2                 | 9.9                | -29.3                    |
| Average | -35.7            | -141.6           | 151.2           | -2.8            | -177.3                   | 148.4                    | -38.5                 | 9.6                | -28.9                    |

**Table S6-1. RMSD,  $\Delta G_{\text{PBSA}}$  and  $\Delta G_{\text{bind}}$  of compound 5**

| Run | RMSD (Å) | $\Delta G_{\text{PBSA}}$ (kcal/mol) | $\Delta G_{\text{bind}}$ (kcal/mol) |
|-----|----------|-------------------------------------|-------------------------------------|
| 1   | 2.53     | -37.8                               | -3.4                                |
| 2   | 2.40     | -39.0                               | 10.3                                |
| 3   | 1.89     | -32.6                               | 2.1                                 |
| 4   | 2.11     | -35.2                               | -5.5                                |

|           |      |       |      |
|-----------|------|-------|------|
| 5         | 1.94 | -37.9 | -6.0 |
| Average   | 2.17 | -36.5 | -0.5 |
| $\pm$ MAE | 0.23 | 2.1   | 5.4  |

**Table S6-2. Component analysis of  $\Delta G_{\text{PBSA}}$  of compound 5**

| Run     | $E_{\text{vdw}}$ | $E_{\text{ele}}$ | $E_{\text{PB}}$ | $E_{\text{SA}}$ | $E_{\text{interaction}}$ | $E_{\text{desolvation}}$ | $E_{\text{NonPolar}}$ | $E_{\text{Polar}}$ | $\Delta G_{\text{PBSA}}$ |
|---------|------------------|------------------|-----------------|-----------------|--------------------------|--------------------------|-----------------------|--------------------|--------------------------|
| 1       | -36.7            | -160.9           | 162.7           | -2.9            | -197.6                   | 159.8                    | -39.6                 | 1.8                | -37.8                    |
| 2       | -35.8            | -173.8           | 173.5           | -2.8            | -209.6                   | 170.6                    | -38.6                 | -0.3               | -39.0                    |
| 3       | -33.3            | -151.4           | 155.0           | -2.9            | -184.7                   | 152.1                    | -36.2                 | 3.6                | -32.6                    |
| 4       | -35.1            | -163.4           | 166.2           | -3.0            | -198.5                   | 163.2                    | -38.1                 | 2.8                | -35.2                    |
| 5       | -35.5            | -169.1           | 169.6           | -2.9            | -204.5                   | 166.7                    | -38.4                 | 0.5                | -37.9                    |
| Average | -35.3            | -163.7           | 165.4           | -2.9            | -199.0                   | 162.5                    | -38.2                 | 1.7                | -36.5                    |

**Table S7-1. RMSD,  $\Delta G_{\text{PBSA}}$  and  $\Delta G_{\text{bind}}$  of compound 6**

| Run       | RMSD (Å) | $\Delta G_{\text{PBSA}}$ (kcal/mol) | $\Delta G_{\text{bind}}$ (kcal/mol) |
|-----------|----------|-------------------------------------|-------------------------------------|
| 1         | 2.02     | -36.1                               | -7.2                                |
| 2         | 1.46     | -36.3                               | -10.3                               |
| 3         | 1.66     | -34.4                               | 4.1                                 |
| 4         | 1.96     | -39.2                               | -21.1                               |
| 5         | 2.51     | -41.9                               | -16.2                               |
| Average   | 1.92     | -37.6                               | -10.1                               |
| $\pm$ MAE | 0.29     | 2.4                                 | 6.87                                |

**Table S7-2. Component analysis of  $\Delta G_{\text{PBSA}}$  of compound 6**

| Run     | $E_{\text{vdw}}$ | $E_{\text{ele}}$ | $E_{\text{PB}}$ | $E_{\text{SA}}$ | $E_{\text{interaction}}$ | $E_{\text{desolvation}}$ | $E_{\text{NonPolar}}$ | $E_{\text{Polar}}$ | $\Delta G_{\text{PBSA}}$ |
|---------|------------------|------------------|-----------------|-----------------|--------------------------|--------------------------|-----------------------|--------------------|--------------------------|
| 1       | -36.2            | -161.2           | 164.2           | -2.9            | -197.4                   | 161.3                    | -39.1                 | 3.0                | -36.1                    |
| 2       | -36.6            | -157.3           | 160.5           | -2.9            | -193.8                   | 157.6                    | -39.5                 | 3.2                | -36.3                    |
| 3       | -36.6            | -166.8           | 172.1           | -3.0            | -203.5                   | 169.1                    | -39.6                 | 5.2                | -34.4                    |
| 4       | -36.0            | -141.2           | 141.1           | -3.0            | -177.3                   | 138.1                    | -39.1                 | -0.1               | -39.2                    |
| 5       | -36.8            | -157.7           | 155.5           | -2.9            | -194.5                   | 152.6                    | -39.7                 | -2.2               | -41.9                    |
| Average | -36.4            | -156.8           | 158.7           | -2.9            | -193.3                   | 155.7                    | -39.4                 | 1.8                | -37.6                    |

**Table S8-1. RMSD,  $\Delta G_{\text{PBSA}}$  and  $\Delta G_{\text{bind}}$  of compound 7**

| Run | RMSD (Å) | $\Delta G_{\text{PBSA}}$ (kcal/mol) | $\Delta G_{\text{bind}}$ (kcal/mol) |
|-----|----------|-------------------------------------|-------------------------------------|
|-----|----------|-------------------------------------|-------------------------------------|

|         |      |       |      |
|---------|------|-------|------|
| 1       | 2.69 | -35.4 | 6.8  |
| 2       | 2.10 | -30.7 | 16.3 |
| 3       | 2.71 | -27.8 | 38.8 |
| 4       | 1.80 | -26.5 | 1.7  |
| 5       | 2.17 | -32.7 | 4.3  |
| Average | 2.29 | -30.6 | 13.6 |
| ±MAE    | 0.32 | 2.8   | 11.2 |

**Table S8-2. Component analysis of  $\Delta G_{\text{PBSA}}$  of compound 7**

| Run     | $E_{\text{vdw}}$ | $E_{\text{ele}}$ | $E_{\text{PB}}$ | $E_{\text{SA}}$ | $E_{\text{interaction}}$ | $E_{\text{desolvation}}$ | $E_{\text{NonPolar}}$ | $E_{\text{Polar}}$ | $\Delta G_{\text{PBSA}}$ |
|---------|------------------|------------------|-----------------|-----------------|--------------------------|--------------------------|-----------------------|--------------------|--------------------------|
| 1       | -38.4            | -130.5           | 136.6           | -3.1            | -168.9                   | 133.5                    | -41.5                 | 6.1                | -35.4                    |
| 2       | -36.3            | -151.7           | 160.4           | -3.1            | -187.9                   | 157.3                    | -39.4                 | 8.8                | -30.7                    |
| 3       | -35.8            | -145.1           | 156.3           | -3.2            | -180.9                   | 153.1                    | -39.0                 | 11.2               | -27.8                    |
| 4       | -39.4            | -152.1           | 168.1           | -3.1            | -191.5                   | 165.0                    | -42.5                 | 16.0               | -26.5                    |
| 5       | -40.8            | -148.7           | 159.9           | -3.1            | -189.5                   | 156.7                    | -43.9                 | 11.2               | -32.7                    |
| Average | -38.1            | -145.6           | 156.3           | -3.1            | -183.7                   | 153.1                    | -41.3                 | 10.7               | -30.6                    |





**3-(6-Carbamoyl-8-oxo-9-phenyl-8,9-dihydro-7H-purin-2-yl)benzoic acid (2)**

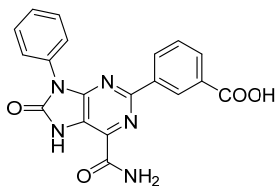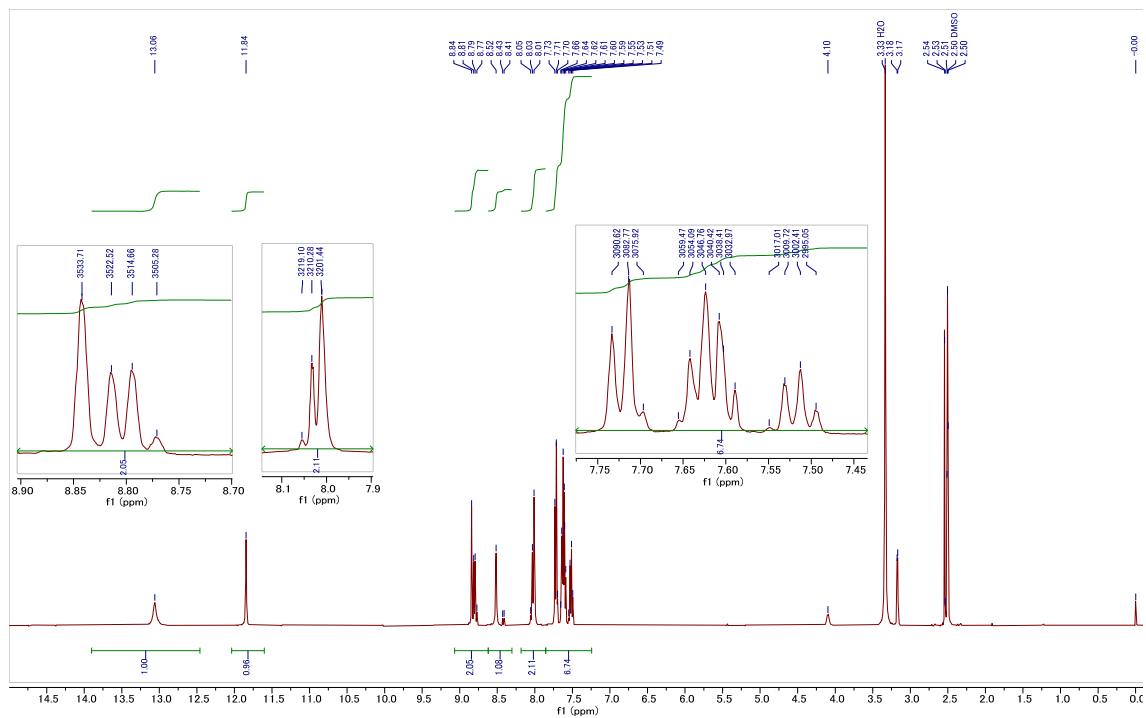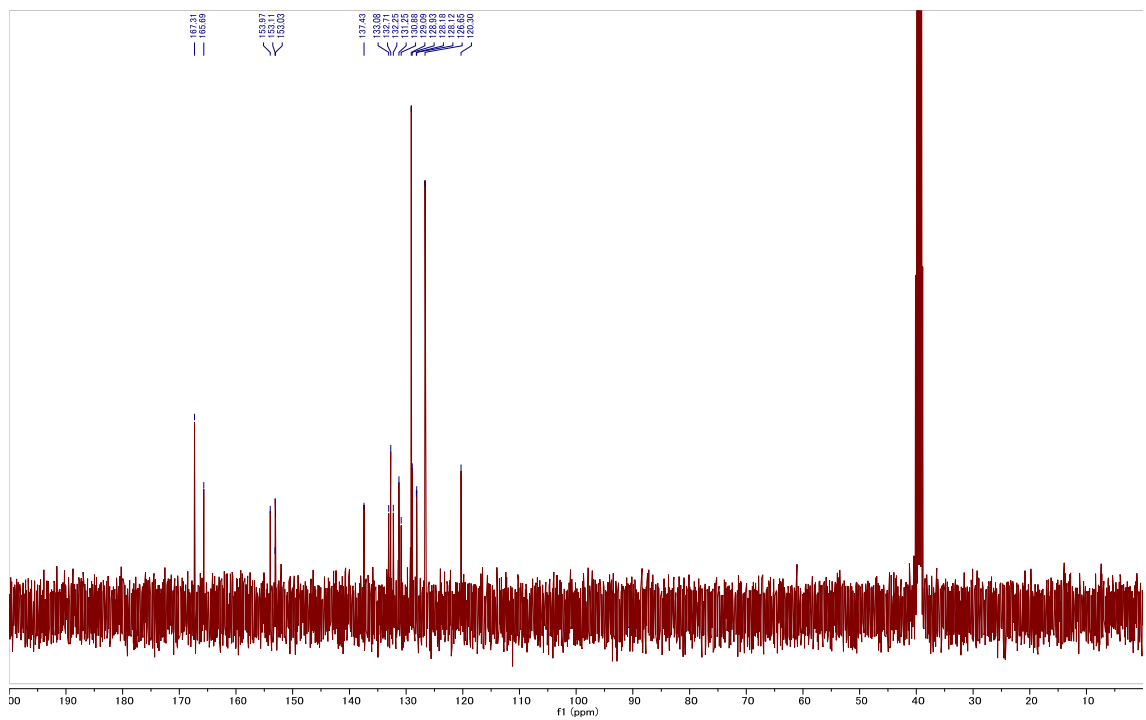

6-Carbamoyl-8-oxo-9-phenyl-8,9-dihydro-7H-purine-2-carboxylic acid (3)

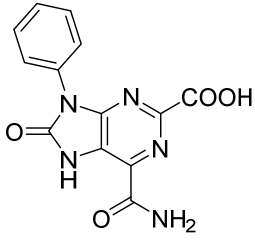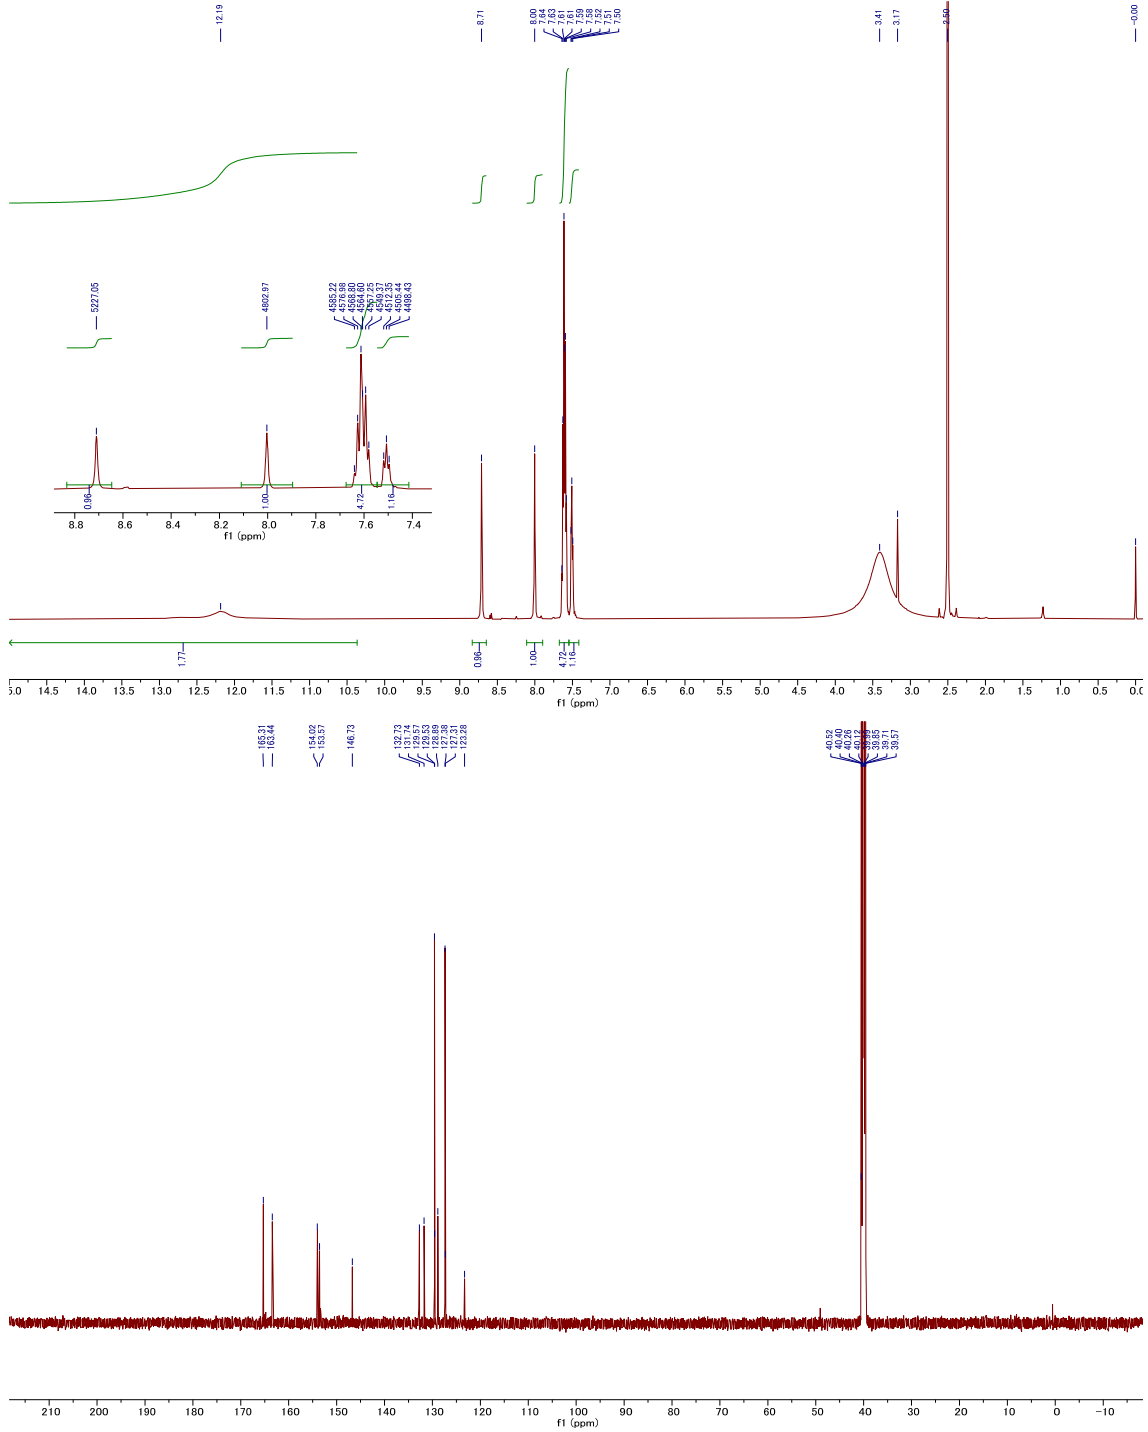

2-(6-Carbamoyl-8-oxo-9-phenyl-8,9-dihydro-7H-purin-2-yl)acetic acid (4)

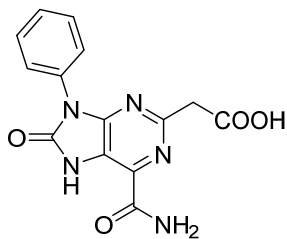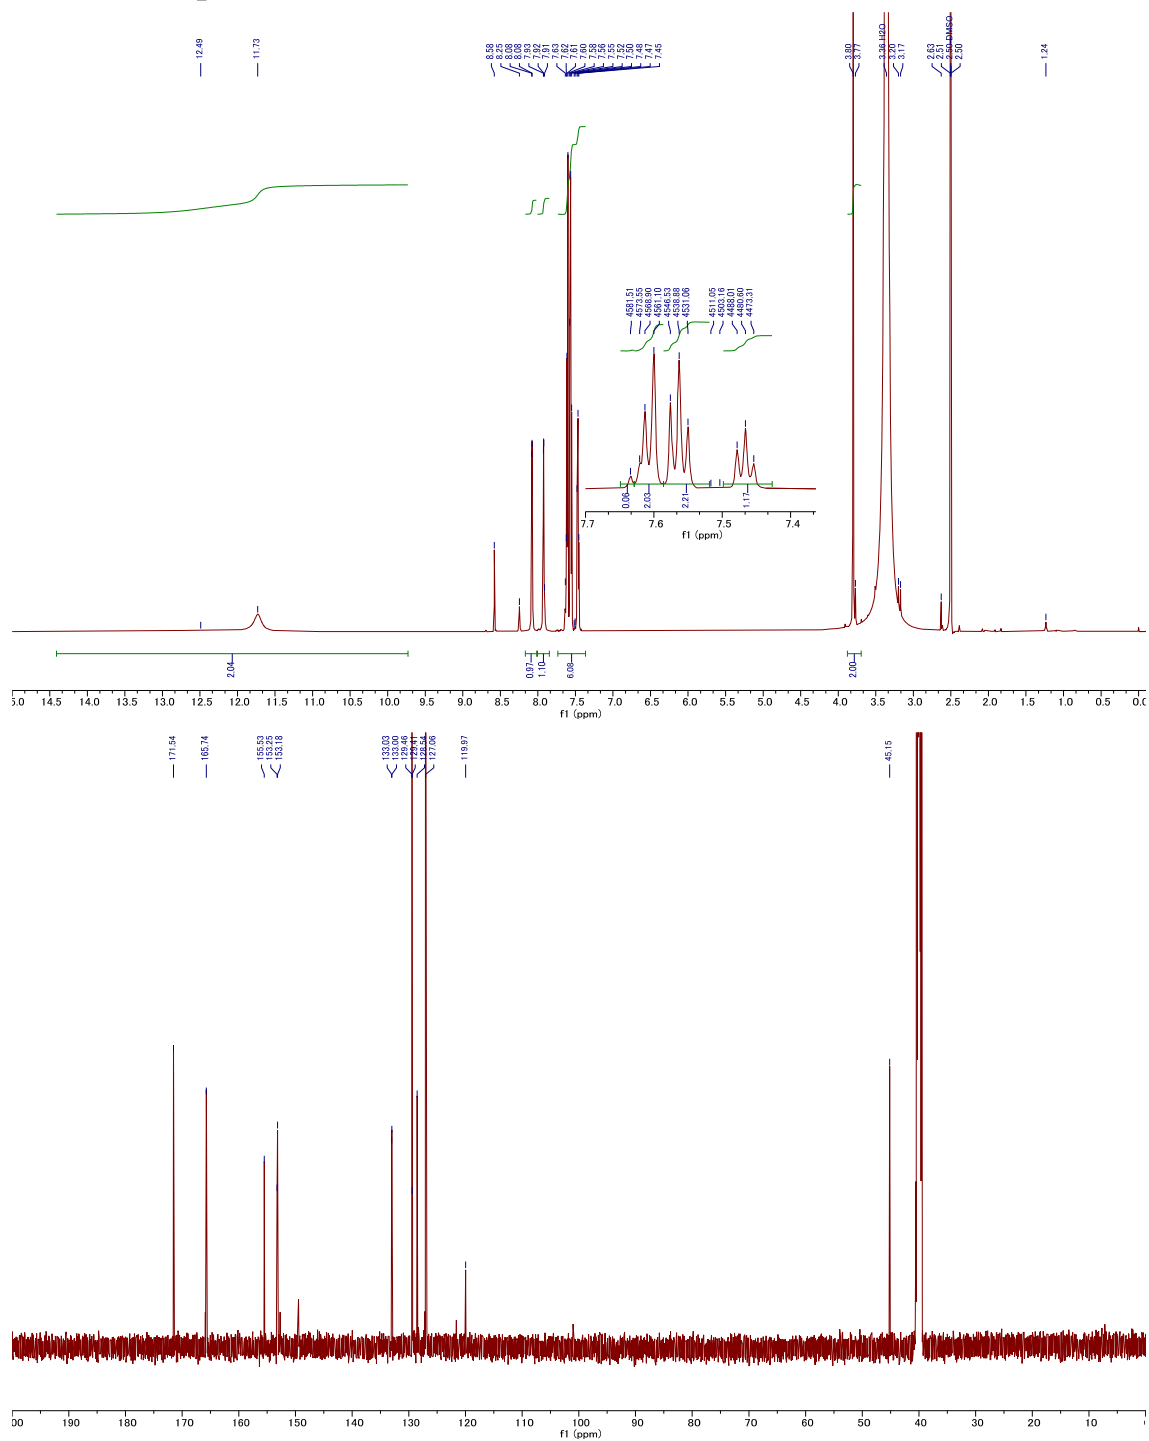

3-(6-carbamoyl-8-oxo-9-phenyl-8,9-dihydro-7H-purin-2-yl)propanoic acid (5)

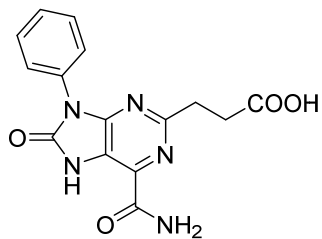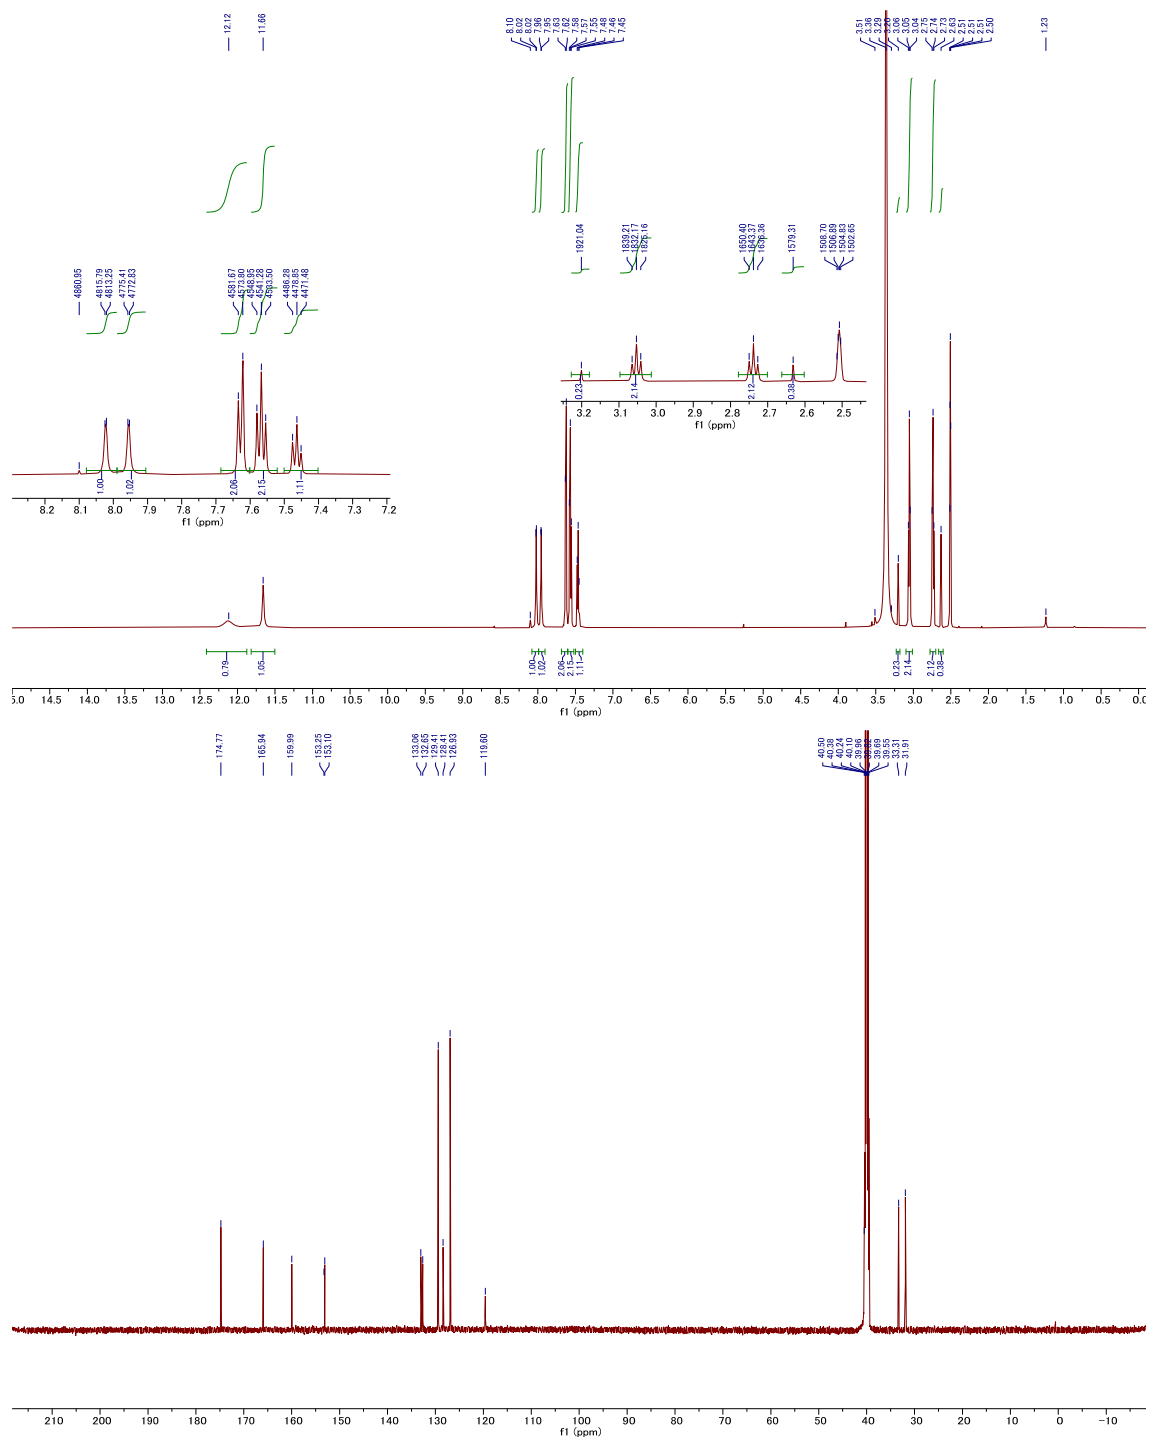

**(E)-3-(6-carbamoyl-8-oxo-9-phenyl-8,9-dihydro-7H-purin-2-yl)acrylic acid (6)**

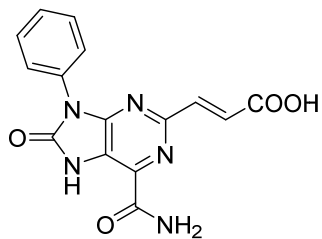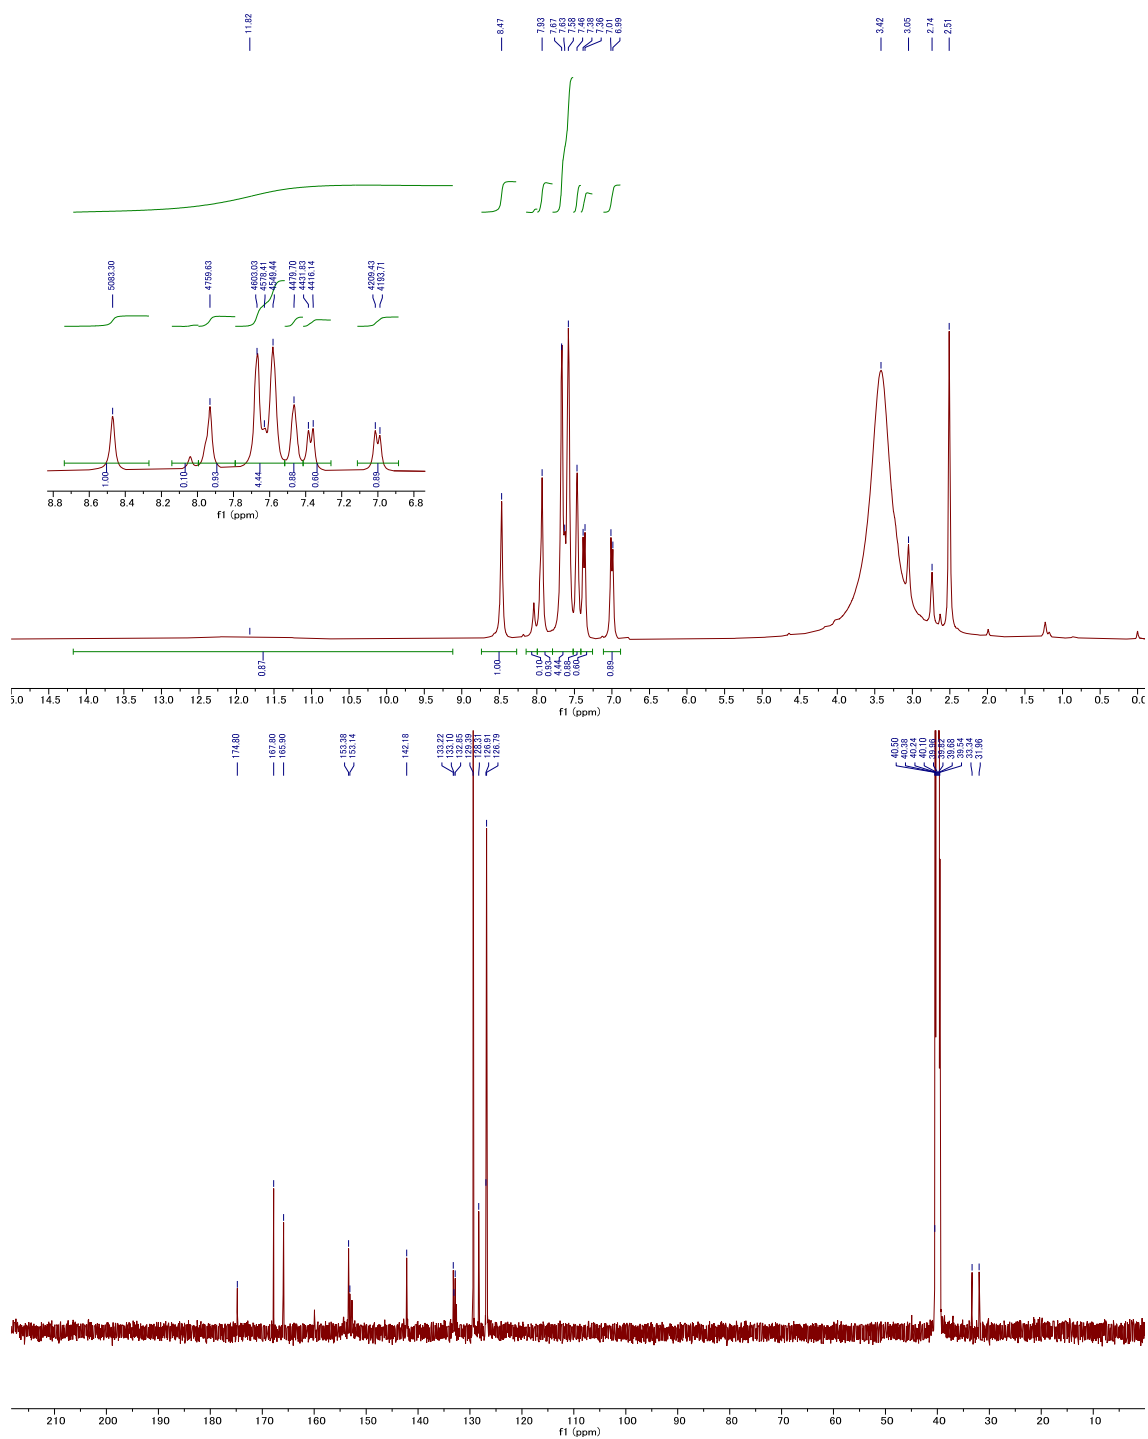

4-(6-carbamoyl-8-oxo-9-phenyl-8,9-dihydro-7H-purin-2-yl)butanoic acid (7)

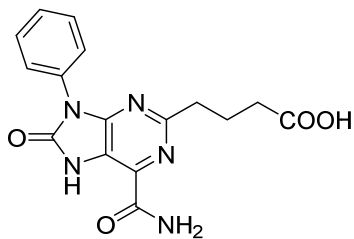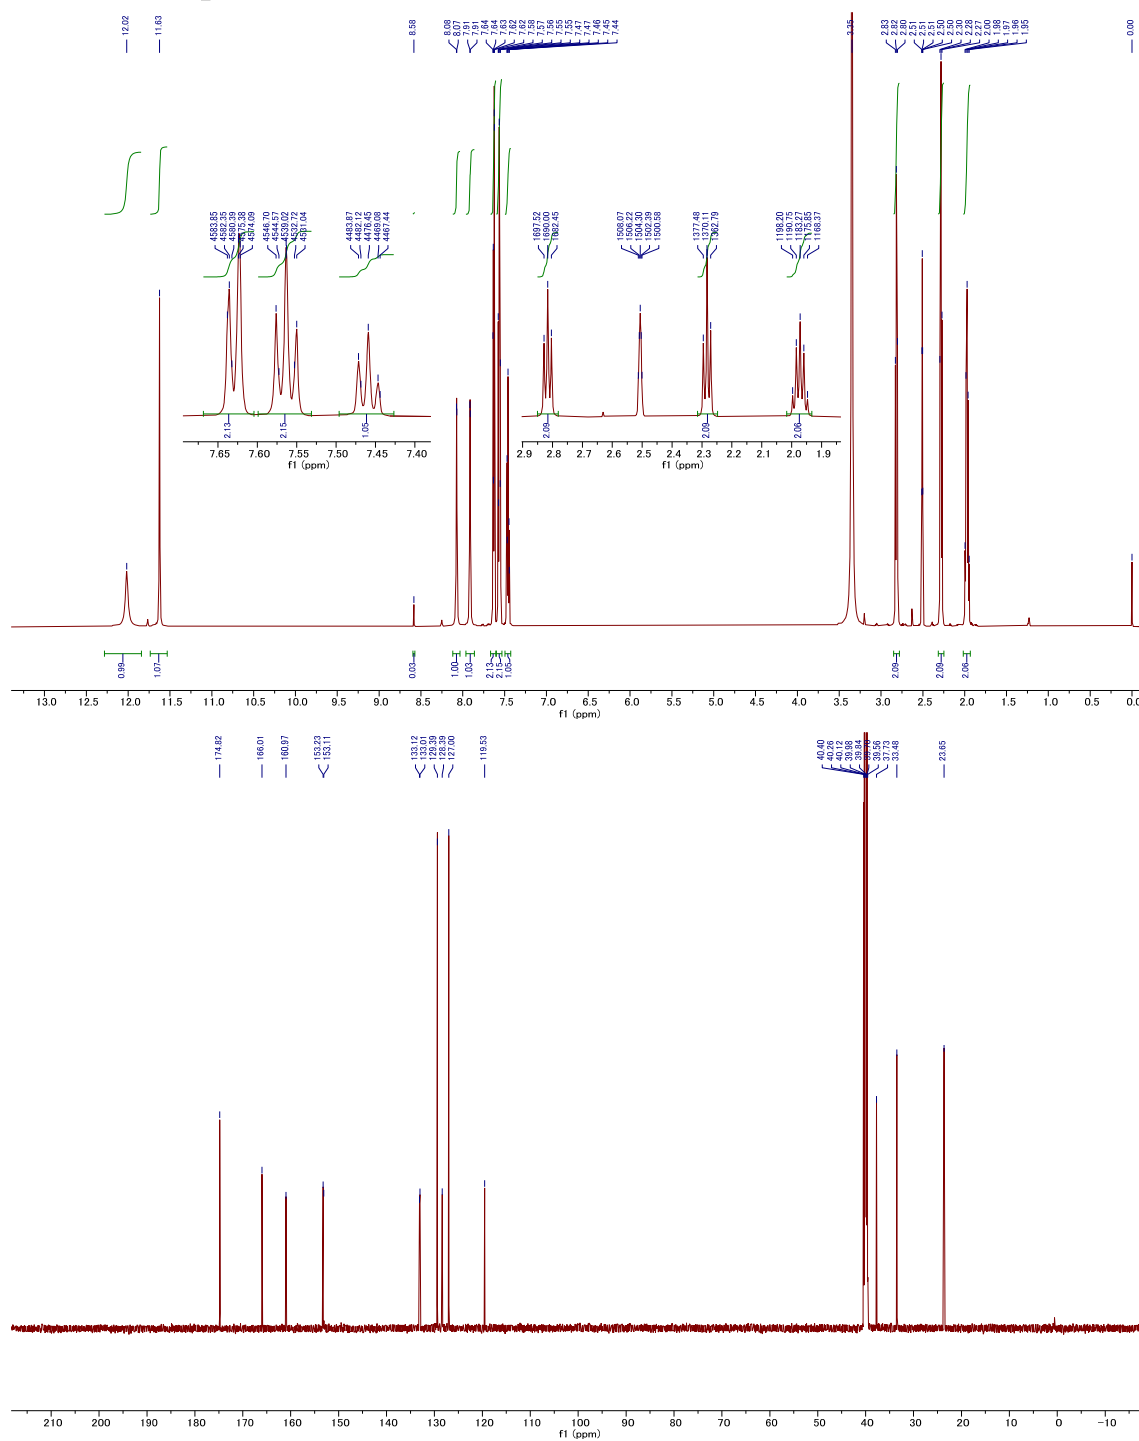

**3-(6-carbamoyl-9-(4-(dimethylamino)phenyl)-8-oxo-8,9-dihydro-7H-purin-2-yl) benzoic acid**

(8)

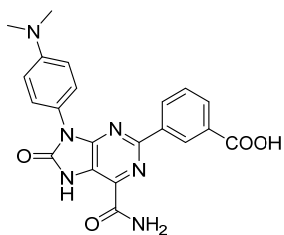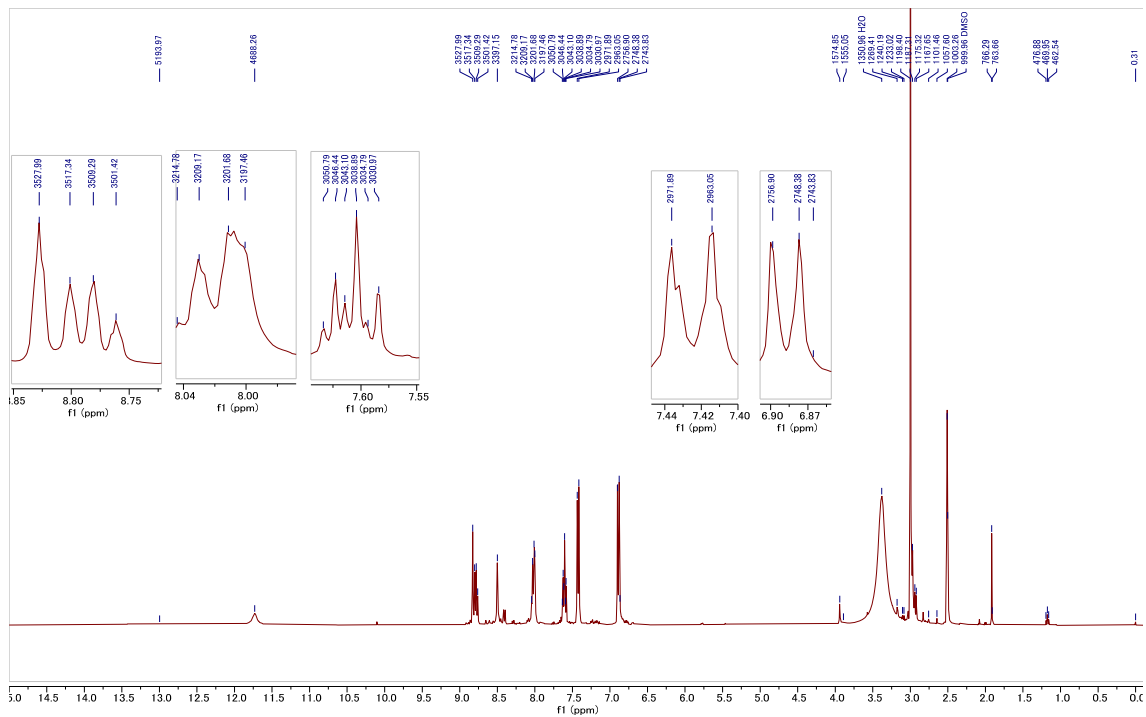



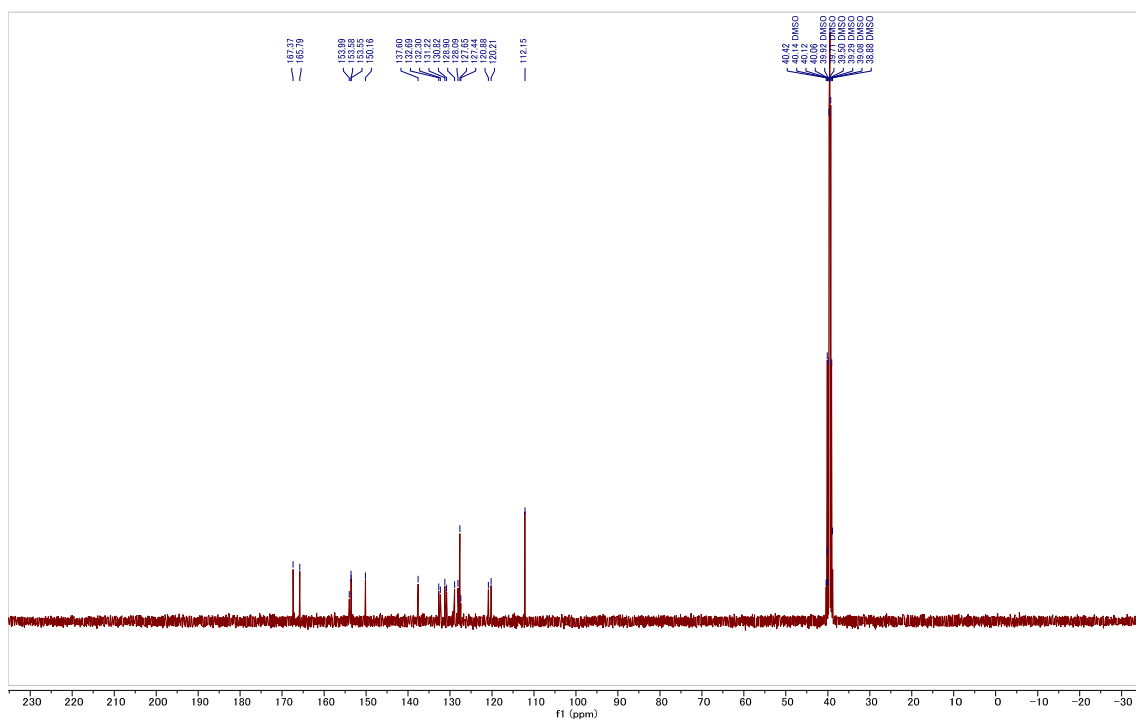

### 3-(6-Carbamoyl-9-(4-methoxyphenyl)-8-oxo-8,9-dihydro-7H-purin-2-yl)benzoic acid (9)

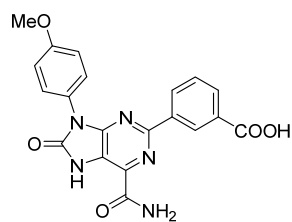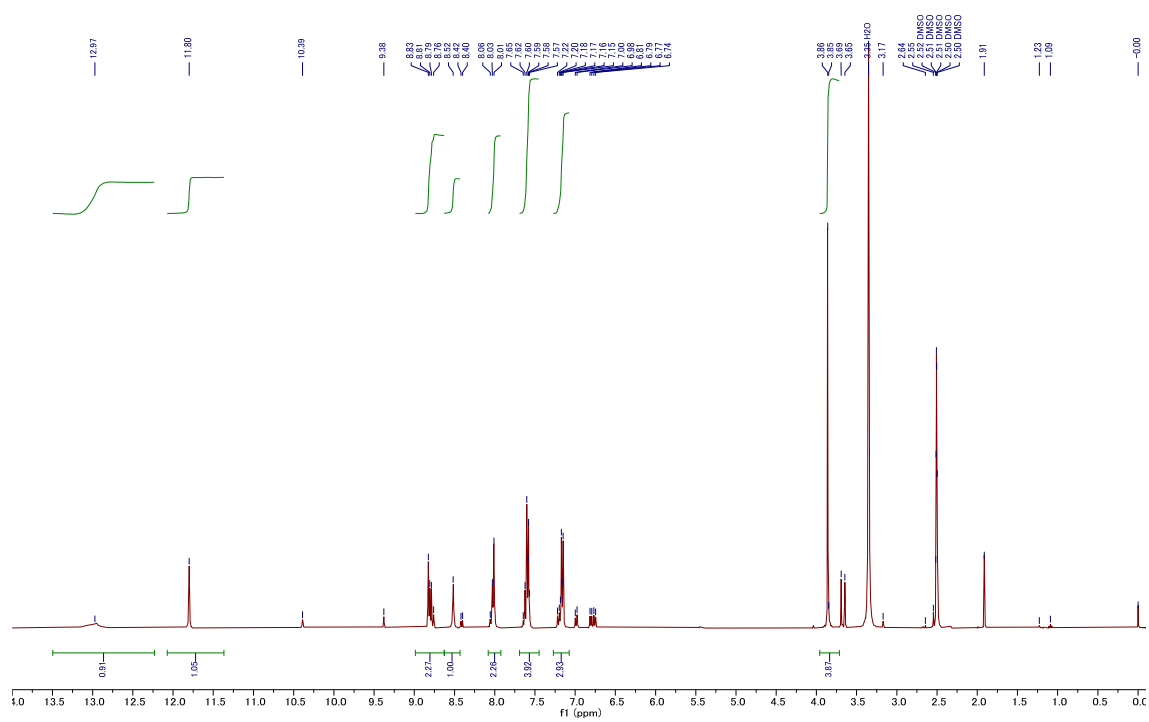

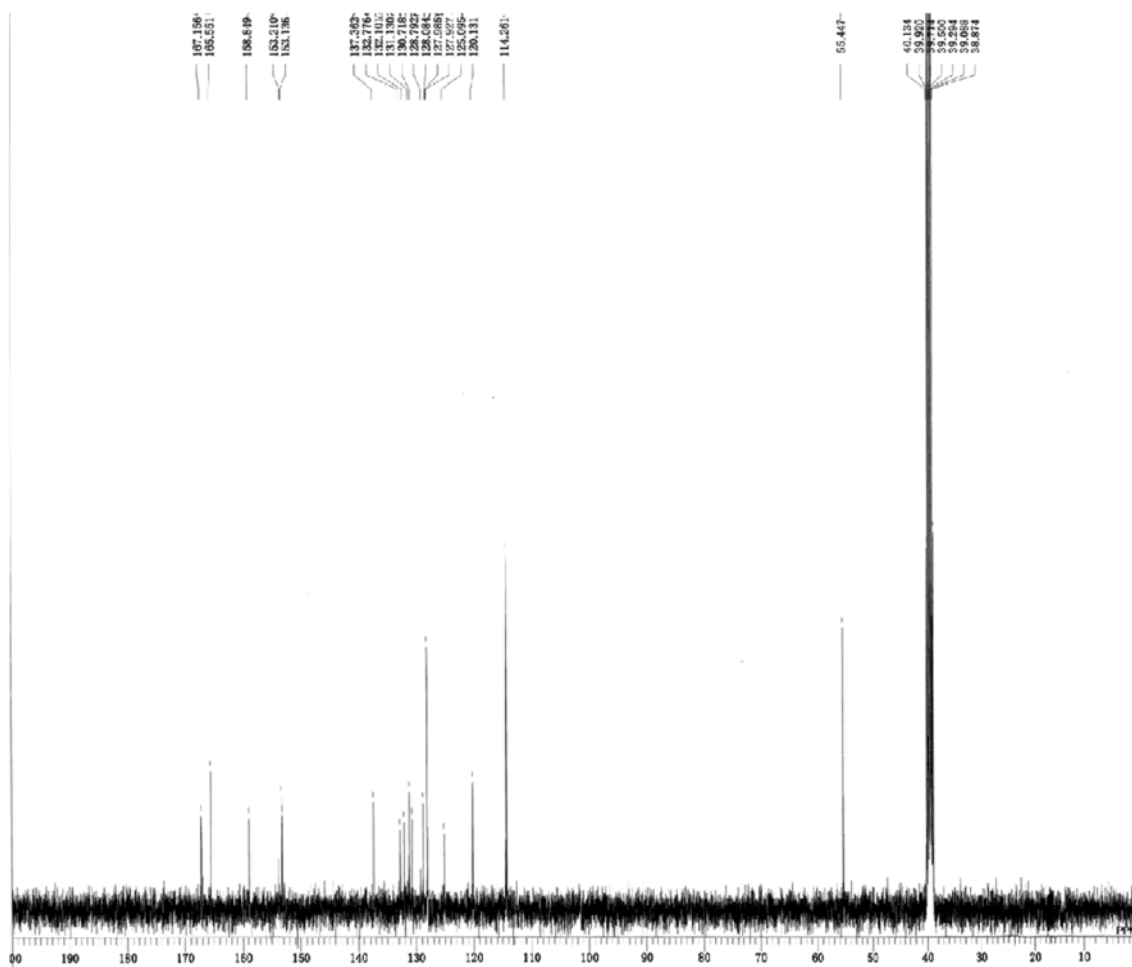

**3-(6-Carbamoyl-8-oxo-9-(p-tolyl)-8,9-dihydro-7H-purin-2-yl)benzoic acid (10)**

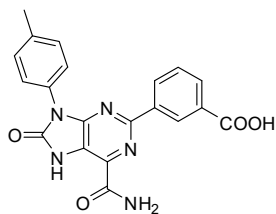





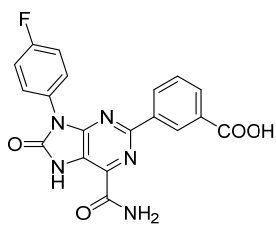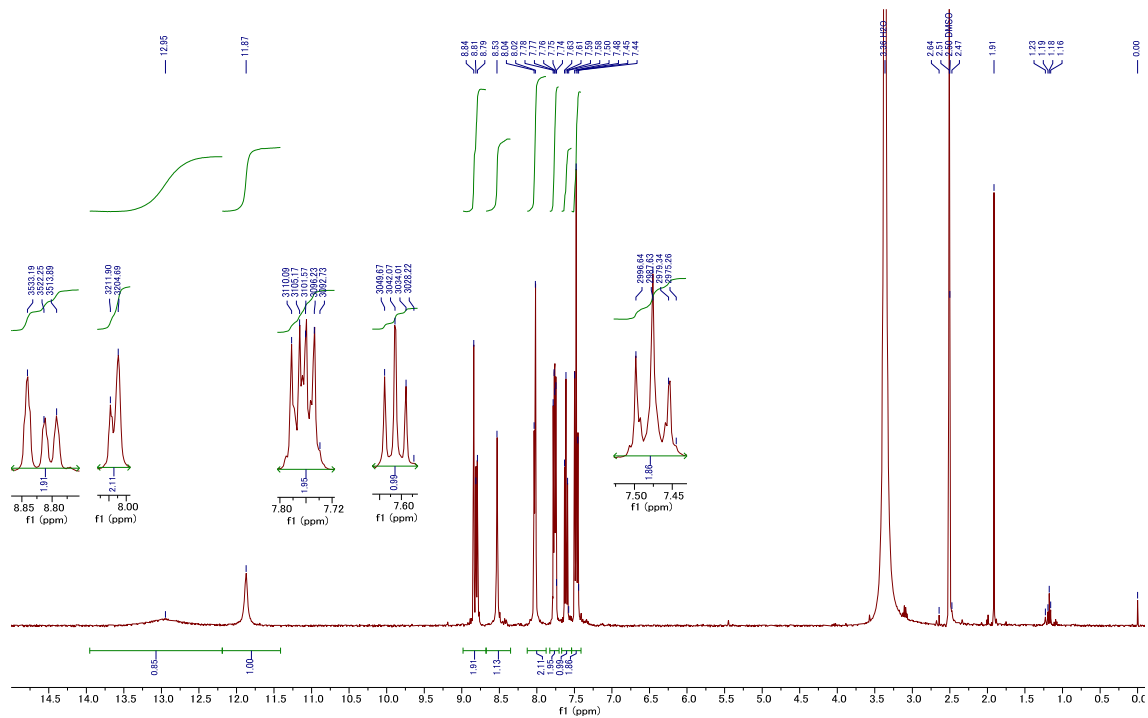

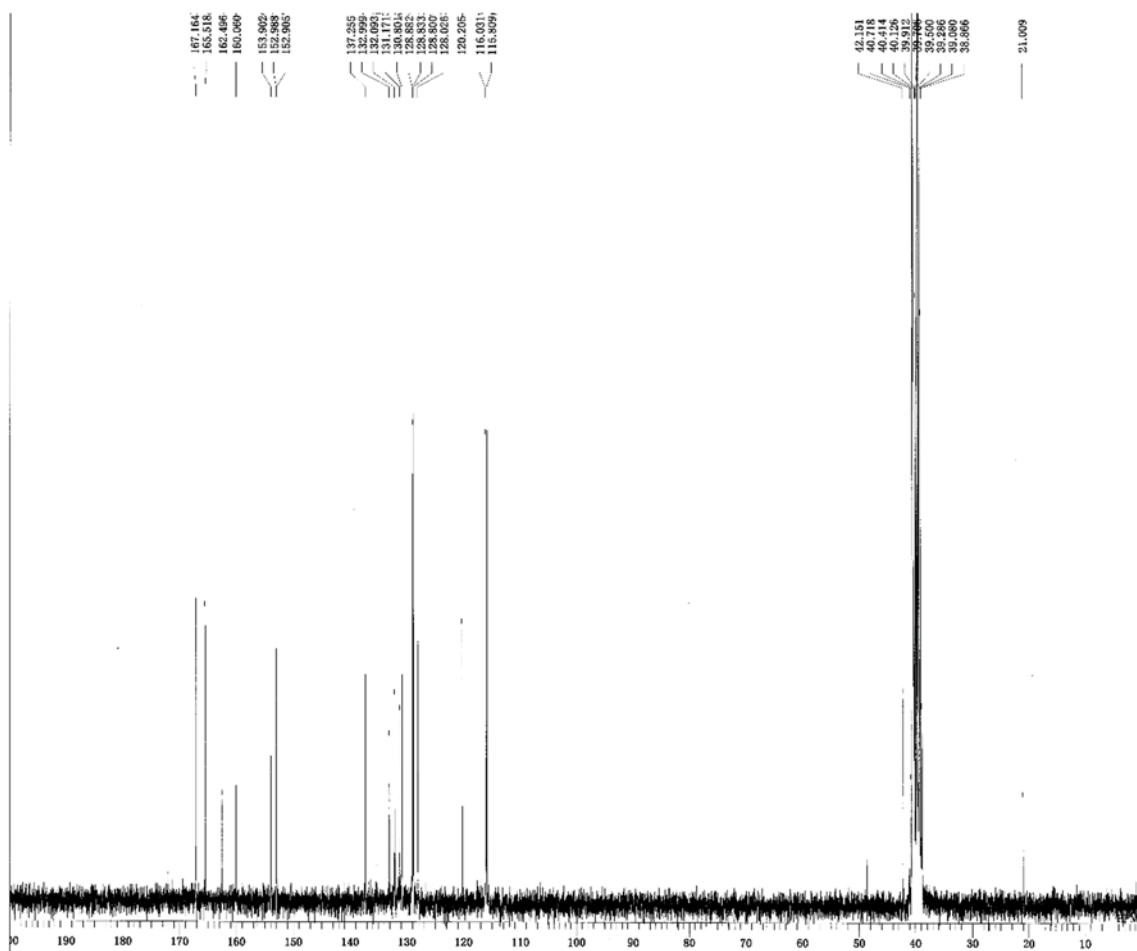

**3-(6-Carbamoyl-9-(4-chlorophenyl)-8-oxo-8,9-dihydro-7H-purin-2-yl)benzoic acid (13)**

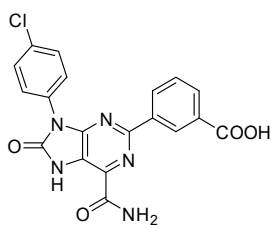



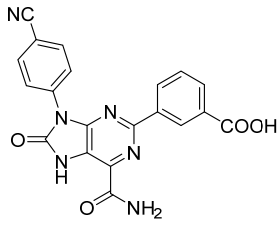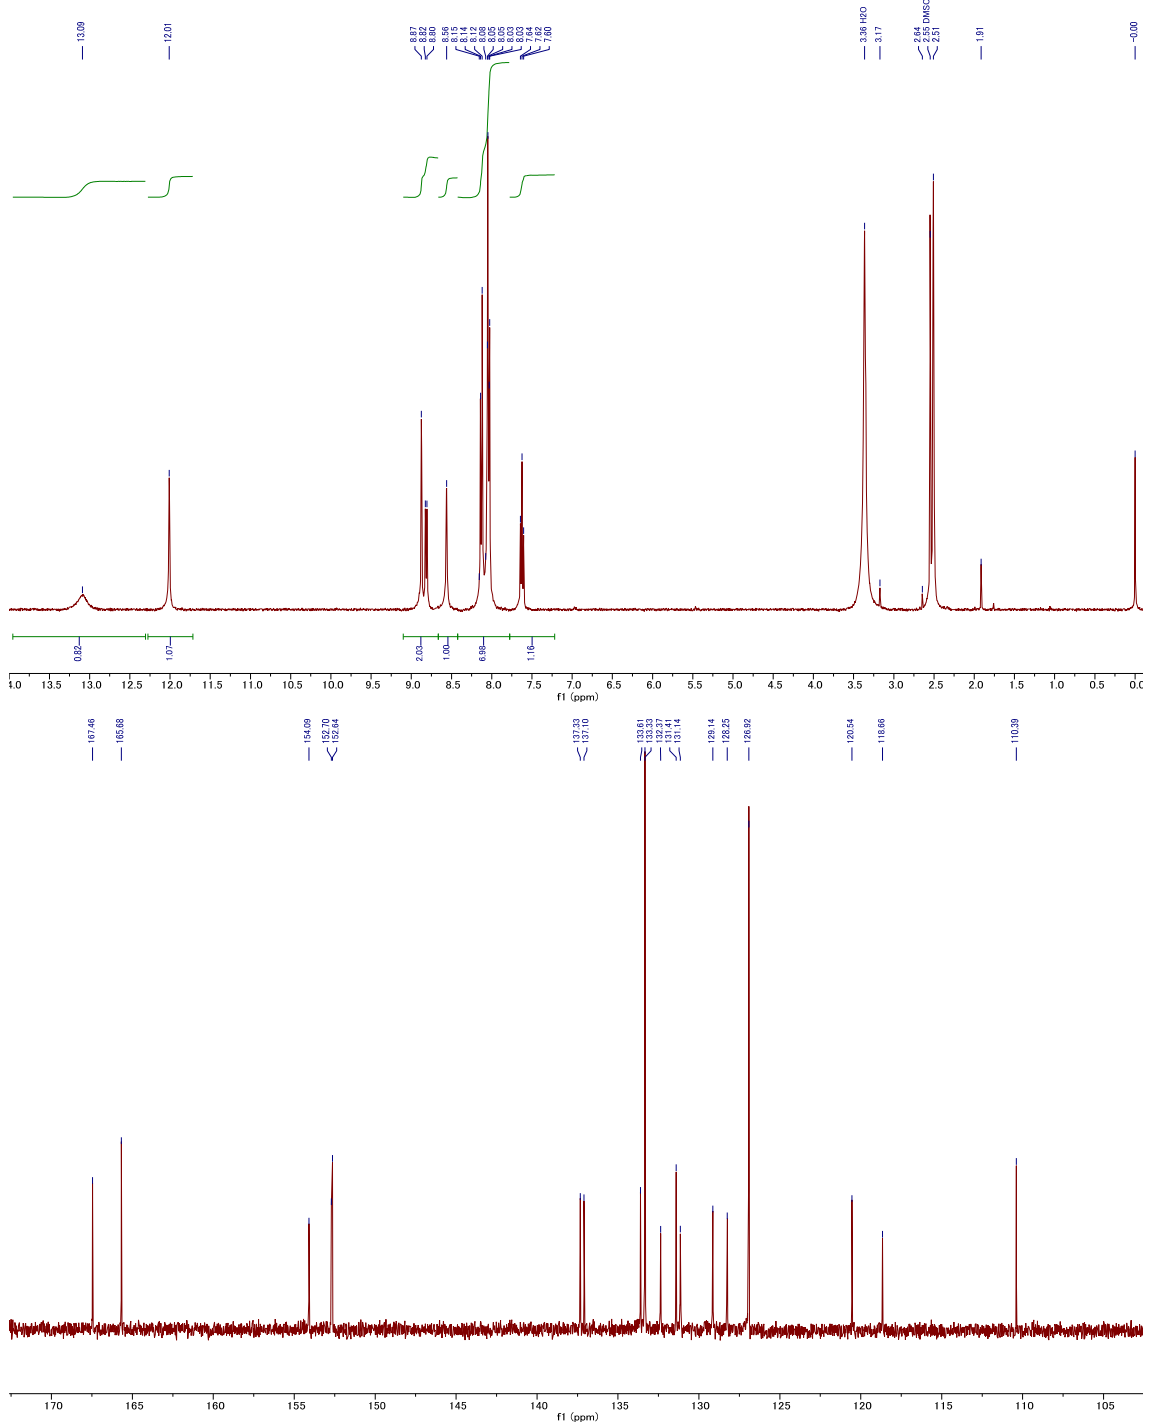



### 3-(6-carbamoyl-9-(4-nitrophenyl)-8-oxo-8,9-dihydro-7H-purin-2-yl)benzoic acid (15)

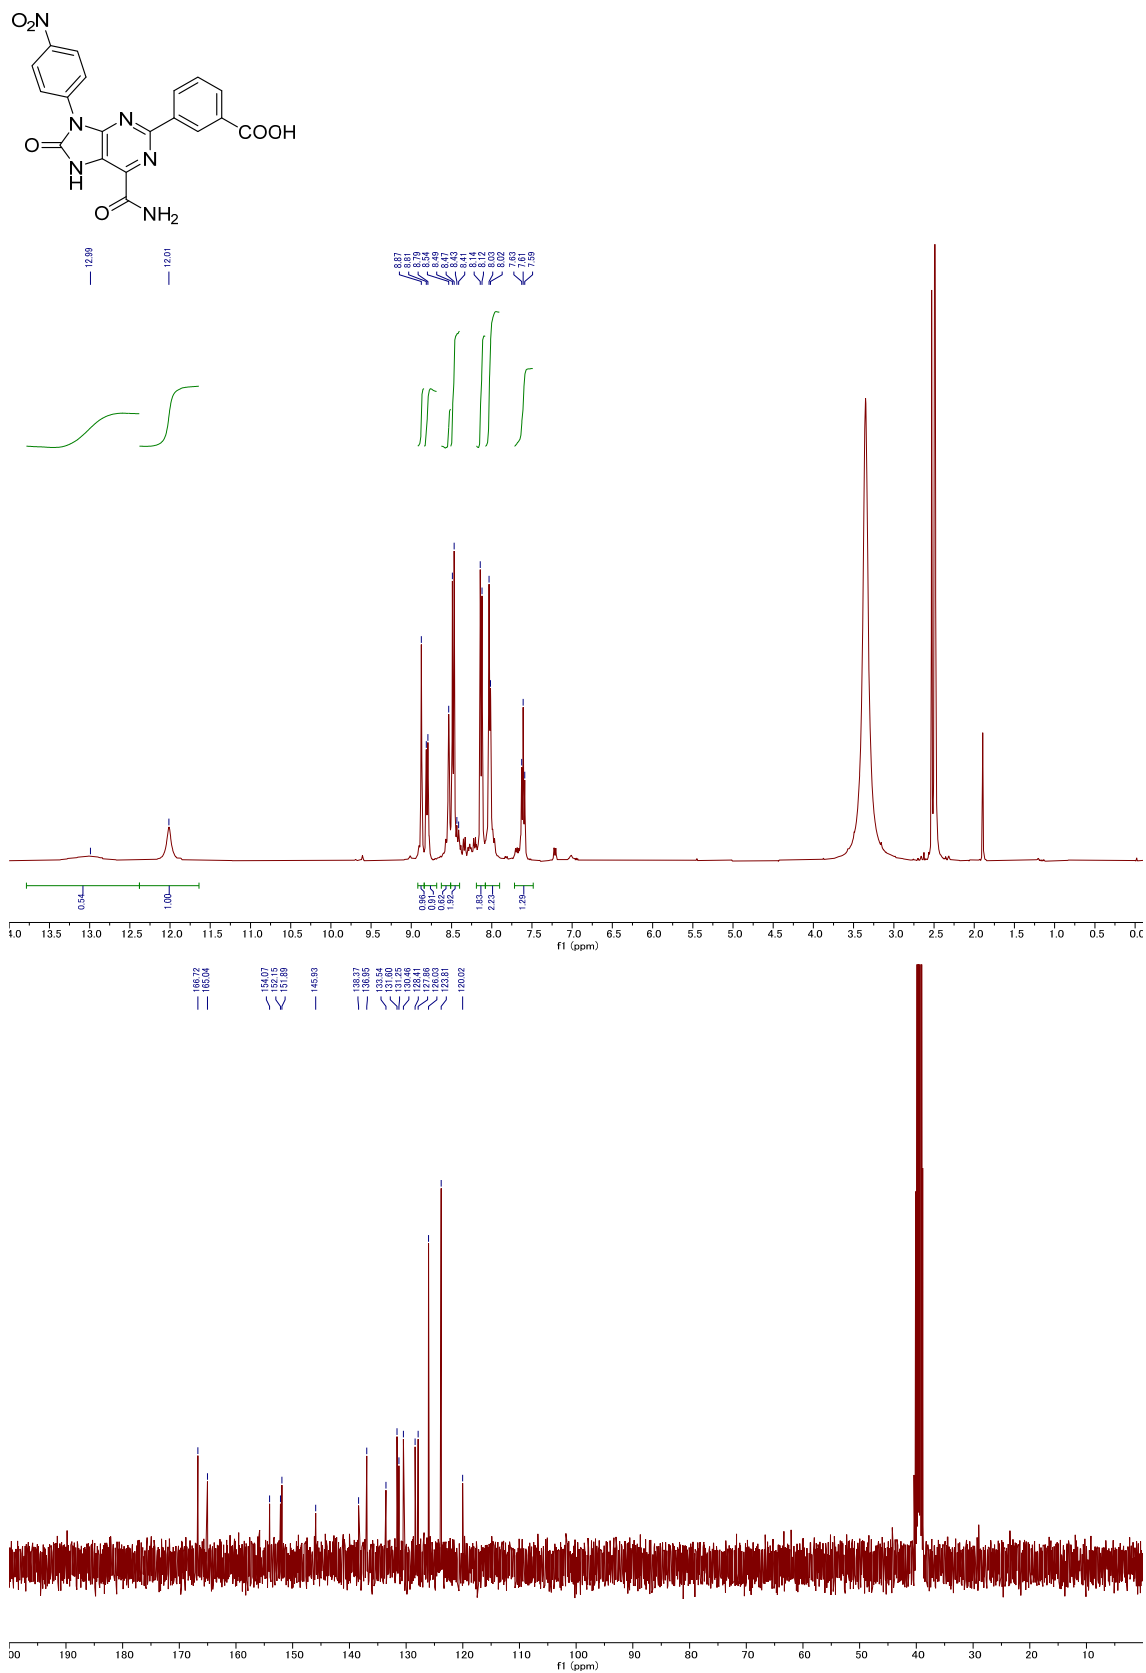

Supplement: d3md00755c2.pdf [file d3md00755c2.pdf]
